# Supplementary material for: Janus kinase inhibitor significantly improved rash and muscle strength in juvenile dermatomyositis
Source: PubMed Central journal article supplement — Ann Rheum Dis. 2020 Oct 28;80(4):543–5. doi: 10.1136/annrheumdis-2020-218582 (PMC7958081; doi:10.1136/annrheumdis-2020-218582), 2020-10-28
Supplement: annrheumdis-2020-218582supp001.pdf [file annrheumdis-2020-218582supp001.pdf]

### Diagnostic and classification criteria

JDM was diagnosed and categorized according to Bohan and Peter's criteria. The inclusion criteria were: 1)  $\leq 18$  years of age; 2) refractory JDM, defined as patients with no clinical improvement following treatment with combined therapy of glucocorticoids and over two kinds of immunosuppressant or biological agents; or recurrence during the tapering of glucocorticoids dosage; or relapse of JDM symptoms within 3 months after discontinuation of glucocorticoids [1]; and 3) treated with JAKi. The exclusion criteria were: 1) other chronic or inflammatory diseases; 2) ongoing infection; or 3) severe gastrointestinal tract involvement.

**Supplementary Table 1. Characteristics of the patients**

|                                        | N=25          |
|----------------------------------------|---------------|
| Female                                 | 11 (44%)      |
| Ethnic group (Han/Minority)            | 24/1          |
| Age at disease onset (years)           | 4.6 $\pm$ 3.3 |
| Age at starting JAKi (years)           | 7.2 $\pm$ 4.0 |
| Age at the end of follow-up (years)    | 7.9 $\pm$ 4.0 |
| Diagnosis (JDM/CADM)                   | 23/2          |
| Refractory                             |               |
| No response to GC+IA <sup>s2</sup> /BA | 8 (32%)       |
| Relapse <sup>†</sup>                   | 17 (68%)      |
| Other diagnoses                        |               |
| Cataract                               | 3 (12%)       |
| Compression fracture                   | 1 (4%)        |
| Hypertension                           | 1 (4%)        |
| Interstitial lung disease              | 4 (16%)       |
| Joint contracture                      | 1 (4%)        |
| Symptoms at disease onset              |               |
| Rash <sup>‡</sup>                      | 24 (96%)      |
| Heliotrope rash                        | 22 (88%)      |
| Malar/facial erythema                  | 24 (96%)      |
| Gottron's sign                         | 18 (72%)      |
| Skin ulcer                             | 10 (40%)      |
| Muscle weakness                        | 17 (68%)      |

|                                                      |                  |
|------------------------------------------------------|------------------|
| Dysphagia/hoarseness/drinking cough/low voice        | 8 (32%)          |
| Fever                                                | 6 (24%)          |
| Maximum CK (U/L)                                     | 594 (276-1203)   |
| Maximum LDH (U/L)                                    | 548 (389-660)    |
| Myositis-specific antibodies (MSA)                   |                  |
| Negative <sup>¶</sup>                                | 14 (56%)         |
| Anti-NXP2 Positive                                   | 8 (32%)          |
| Anti-MDA5 Positive                                   | 1 (4%)           |
| Anti-JO-1 Positive                                   | 1 (4%)           |
| Anti-PL-7 Positive                                   | 1 (4%)           |
| Anti KU Positive                                     | 1 (4%)           |
| ANA positive                                         | 6 (24%)          |
| Anti-Ro-52 positive                                  | 5 (20%)          |
| Therapy before JAKi started                          |                  |
| GC+IA <sup>≤2</sup>                                  | 9 (36%)          |
| GC+IA <sup>&gt;2</sup>                               | 7 (28%)          |
| GC+IA+IVIG                                           | 4 (16%)          |
| GC+IA+IVIG+BA                                        | 3 (12%)          |
| GC+IA+IVIG+plasma exchange/ASCT                      | 2 (8%)           |
| Therapy when JAKi started                            |                  |
| GC                                                   | 3 (12%)          |
| IA <sup>≤2</sup>                                     | 2 (8%)           |
| GC+IA <sup>≤2</sup>                                  | 15 (60%)         |
| GC+IA <sup>&gt;2</sup>                               | 1 (4%)           |
| GC+IA <sup>≤2</sup> +IVIG                            | 3 (12%)          |
| GC+IA <sup>≤2</sup> +BA                              | 1 (4%)           |
| Disease course of JDM before JAKi treatment (months) | 21.0 (14.0-36.5) |
| JAKi, <25 kg, 2.5 mg bid                             | 11 (44%)         |
| JAKi, ≥25 kg, 5 mg bid                               | 14 (56%)         |
| Ruxolitinib                                          | 18 (72%)         |
| Tofacitinib                                          | 7 (28%)          |
| Follow up (months)                                   | 7 (4.0-12.0)     |

Continuous data are presented as mean ± SD or median (interquartile range). Category data are presented as number and percentage.

JAKi: Janus-kinase inhibitor; JDM: juvenile dermatomyositis; CADM: clinically amyopathic dermatomyositis; CK: creatinine kinase; LDH: lactate dehydrogenase; NXP2: nuclear matrix protein 2; MDA5: melanoma differentiation-associated gene 5; ANA: antinuclear antibodies; GC: glucocorticoids; IA: immunosuppressive agents; IA<sup>≤2</sup>: two or fewer types of IA; A<sup>>2</sup>: more than two types of IA; IVIG: intravenous immunoglobulins; BA: biological agents.

<sup>†</sup> Relapsing: manifestations recur during GC dosage reduction or within 3 months after GC withdrawal.

<sup>‡</sup> Rash: Heliotrope rash; Malar/ facial erythema; Gottron's sign.

<sup>¶</sup> In six patients, the antibodies were tested after treatment in other hospitals.

**Supplementary Table 2. Disease activity markers before and after JAK inhibitor treatment**

|                              | n  | Before JAKi         | After JAKi          | P       |
|------------------------------|----|---------------------|---------------------|---------|
| CAT-BM activity score        | 25 | 7.0 (3.0-10.0)      | 0.0 (0.0-1.0)       | <0.001* |
| CAT-BM damage score          | 25 | 0.0 (0.0-1.0)       | 0.0 (0.0-1.0)       | --      |
| CMAS                         | 10 | 24.9±18.0           | 38.2±7.4            | 0.023*  |
| CK (U/L)                     | 12 | 107.5 (79.8-177.8)  | 124.0 (61.0-178.8)  | 0.814   |
| LDH (U/L)                    | 12 | 306.3 (361.5-463.3) | 275.8 (291.0-394.8) | 0.034*  |
| SF (ng/mL)                   | 25 | 81.2 (55.4-113.0)   | 64.3 (37.2-98.2)    | 0.010*  |
| Hospitalizations in 6 months | 12 | 2.5 (1.0-4.8)       | 0.0 (0.0-2.8)       | 0.028*  |

Continuous data are presented as mean ± SD or median (interquartile range). Category data are presented as number and percentage.

CAT-BM: Cutaneous Assessment Tool Binary Method; CMAS: Childhood Myositis Assessment Scale; CK: creatinine kinase; LDH: lactate dehydrogenase; SF: serum ferritin.

\* Significantly statistic difference, P<0.05.
